# Supplementary material
Source: Springer Nature journal article supplement (https://www.springermedizin.de/resource/supplementary/12943_2011_916_MOESM14_ESM.pdf/9551998)

**A**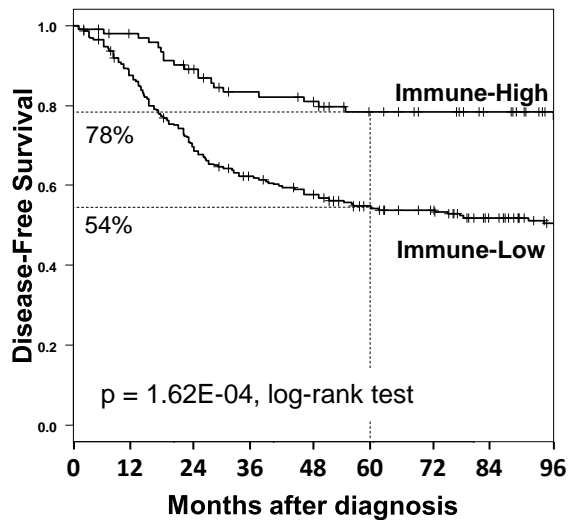**B**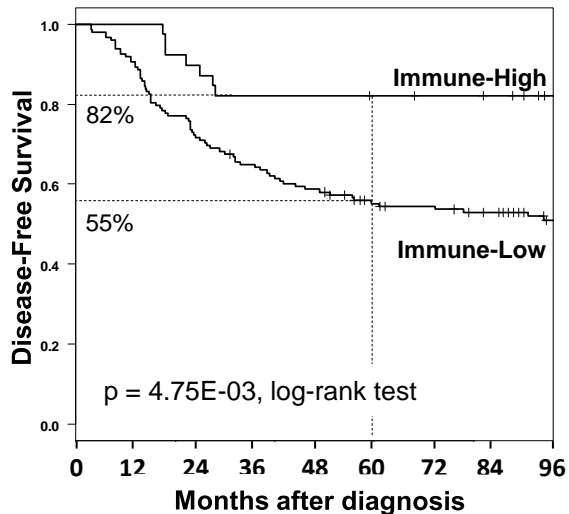

Supplement: MOESM14 [file 9551998]
